# Supplementary material
Source: ML conference proceedings conference paper supplement (https://proceedings.neurips.cc/paper_files/paper/2018/hash/1141938ba2c2b13f5505d7c424ebae5f-Abstract.html)
Supplement: Supplementary file [file 1141938ba2c2b13f5505d7c424ebae5f-Supplemental.zip]

# LIBSVM核心代码导读

*chilynntse(谢志宁), version 1.0*

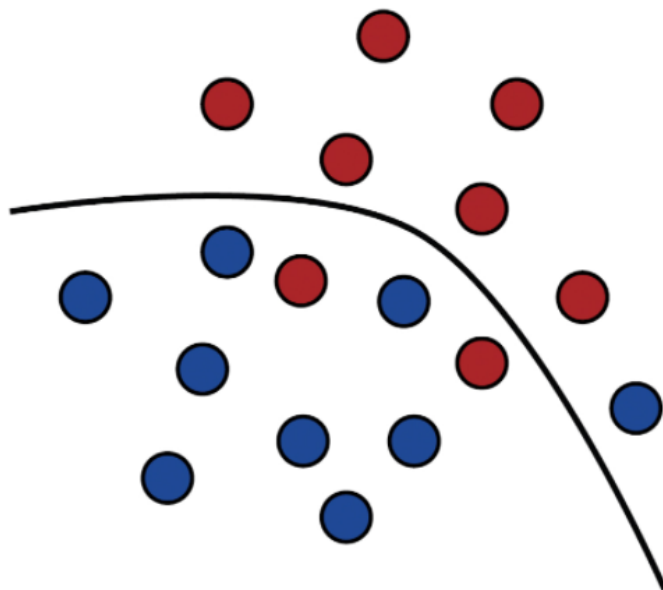

2016年11月

# 关于这篇文章

本文主要介绍SVM相关的理论背景，SMO算法以及LIBSVM的一些核心代码，我们会发现，LIBSVM的核心代码大部分都是围绕SMO展开的，如何选取 $\alpha$ ，如何更新 $\alpha$ ，还包括一些优化技巧等。SVM的类型有很多，主要包括：C-SVC， $\nu$ -SVC，One-class SVM， $\epsilon$ -SVR， $\nu$ -SVR，本文主要是基于C-SVC进行阐述，对于一些基本的推导（例如：如何推导出SVM的学习问题）将不在本文再赘述，默认大家对SVM有一定了解

LIBSVM还有很多可以深入的点，例如：框架设计，SVM的多分类问题，缓存，参数选取等等，在这个版本中不能为大家一一介绍，目前只是针对其核心代码为大家导读

本文希望能够将理论与实践相结合，对SVM学习者有一定帮助，同时本文可能存在许多问题，如果对本文有任何评价或建议，欢迎发送邮件到chilynntse@163.com，谢谢

# Contents

|          |                                        |           |
|----------|----------------------------------------|-----------|
| <b>1</b> | <b>拉格朗日对偶性</b>                         | <b>3</b>  |
| 1.1      | 原始问题 . . . . .                         | 3         |
| 1.2      | 对偶问题 . . . . .                         | 4         |
| 1.3      | 原始问题与对偶问题的关系 . . . . .                 | 4         |
| 1.3.1    | 弱对偶 . . . . .                          | 5         |
| 1.3.2    | 强对偶 . . . . .                          | 5         |
| 1.3.3    | 为什么要转换为对偶问题 . . . . .                  | 8         |
| <b>2</b> | <b>SMO</b>                             | <b>9</b>  |
| 2.1      | 如何选择 $i$ 和 $j$ . . . . .               | 11        |
| 2.1.1    | 基于First Order的方法（一个普遍的做法） . . . . .    | 11        |
| 2.1.2    | 基于Second Order的方法（LIBSVM） . . . . .    | 14        |
| 2.2      | 如何更新 $\alpha$ . . . . .                | 21        |
| 2.2.1    | 更新 $\alpha$ . . . . .                  | 21        |
| 2.3      | 更新辅助变量 . . . . .                       | 27        |
| 2.3.1    | 更新 $G$ . . . . .                       | 27        |
| 2.3.2    | $G\_baralpha$ . . . . .                | 28        |
| <b>3</b> | <b>参数<math>w</math>和<math>b</math></b> | <b>30</b> |
| 3.1      | 计算参数 $w$ . . . . .                     | 30        |
| 3.2      | 计算参数 $b$ . . . . .                     | 30        |

# 1 拉格朗日对偶性

## 1.1 原始问题

$$\begin{aligned} \min \quad & f(x) \\ \text{s.t.} \quad & g_i(x) \leq 0, \quad i = 1, \dots, m \\ & h_j(x) = 0, \quad j = 1, \dots, p \end{aligned} \tag{1}$$

其中 $f(x), g_1(x), \dots, g_m(x)$ 都是凸函数,  $h_0(x), h_1(x), \dots, h_p(x)$ 都是仿射函数, 具有这样形式的优化问题是一种凸优化问题, 此外我们把该问题(1)称为原始问题

可以看到, 问题(1)是一个带约束的优化问题, 这些约束条件比较烦人, 我们可以通过构造拉格朗日函数将约束条件与目标函数结合在一起, 我们定义拉格朗日函数为

$$L(x, \alpha, \beta) = f(x) + \sum_{i=1}^m \alpha_i g_i(x) + \sum_{j=1}^p \beta_j h_j(x) \quad \alpha_i \geq 0, \beta_j \in R \tag{2}$$

对于满足约束条件的 $x$ ,  $\max_{\alpha, \beta} L(x, \alpha, \beta)$ 等价于 $f(x)$ , 下面我们违反的情况

- 当存在一个 $x$ 使得 $g_i(x) > 0$ , 我们令 $\alpha_i \rightarrow +\infty$ 使得 $\alpha_i g_i(x) \rightarrow +\infty$ , 其余 $\alpha_i, \beta_j$ 均取0, 则 $\max_{\alpha, \beta} L(x, \alpha, \beta) \rightarrow +\infty$
- 当存在一个 $x$ 使得 $h_j(x) \neq 0$ , 我们令 $\beta_j \rightarrow \infty$ 使得 $\beta_j h_j(x) \rightarrow +\infty$ , 其余 $\alpha_i, \beta_j$ 均取0, 则 $\max_{\alpha, \beta} L(x, \alpha, \beta) \rightarrow +\infty$

$$f(x) = \begin{cases} \max_{\alpha, \beta} L(x, \alpha, \beta) & x \text{ satisfy the constraint} \\ +\infty & \text{others} \end{cases}$$

因此, 我们可以定义一个函数

$$\theta_P(x) = \max_{\alpha, \beta} L(x, \alpha, \beta) \tag{3}$$

对于满足约束条件的 $x$ ,  $\theta_P(x) \iff f(x)$ , 然后我们对 $f(x)$ 取极小, 也就是对 $\theta_P(x)$ 取极小, 即

$$\min_x \theta_P(x) = \min_x \max_{\alpha, \beta} L(x, \alpha, \beta) \quad (4)$$

问题(4)是与原始问题(1)是等价的, 区别在于形式不一样, 一个“有”约束条件, 另一个“没有”约束条件, 假设问题(4)的最优解为 $p^*$

## 1.2 对偶问题

以上我们只是把“带约束形式的原始问题”(1), 改写成了“不带约束形式的原始问题”(4), 接下来我们看下(4)的对偶问题

首先我们先定义一个函数

$$\theta_D(\alpha, \beta) = \min_x L(x, \alpha, \beta) \quad (5)$$

然后对 $\theta_D(\alpha, \beta)$ 取极大, 即

$$\max_{\alpha, \beta} \min_x L(x, \alpha, \beta) = \max_{\alpha, \beta} \theta_D(x) \quad (6)$$

问题(6)是原始问题(4)的对偶问题, 假设问题(6)的最优解为 $d^*$

## 1.3 原始问题与对偶问题的关系

容易知道

$$d^* = \max_{\alpha, \beta} \min_x L(x, \alpha, \beta) \leq \min_x \max_{\alpha, \beta} L(x, \alpha, \beta) = p^* \quad (7)$$

形象地理解就是, “矮子中最高的 $\leq$ 高个中最矮的”

### 1.3.1 弱对偶

弱对偶成立的条件

$$d^* \leq p^* \quad (8)$$

弱对偶对所有的优化问题都成立，对偶问题的最优解 $d^*$ 就是原始问题最优解 $p^*$ 的下界，当我们对原始问题的解不清楚时，我们通过对偶问题来估计或者近似原始问题的解，当然我们希望这个下界 $d^*$ 越逼近 $p^*$ 越好，最理想的情况就是二者相等，即强对偶

### 1.3.2 强对偶

强对偶成立的条件

$$d^* = p^* \quad (9)$$

强对偶需要满足一定的条件，但我们在学习SVM时直接假定强对偶条件成立

强对偶成立的条件是： $f(x), g_1(x), \dots, g_m(x)$ 都是凸函数， $h_0(x), h_1(x), \dots, h_p(x)$ 都是仿射函数，并且 $g_1(x), \dots, g_m(x)$ 是严格可行的，即存在 $x$ ，对所有的 $g_i(x) < 0, i = 1, \dots, m$ 都成立，这个就是Slater条件

这里稍微解释下“ $g_1(x), \dots, g_m(x)$ 是严格可行的，即存在 $x$ ，对所有的 $g_i(x) < 0, i = 1, \dots, m$ 都成立”。这句话等价于该问题是线性可分的，这里的 $x$ 其实是SVM中的参数 $(w, b)$ ， $g_i(x) = 1 - y_i(w\phi(x_i) + b)$ ，替换下就是，即存在一个超平面 $(w, b)$ ，使得对所有的样本 $x_i$ ，都有 $1 - y_i(w\phi(x_i) + b) < 0, i = 1, \dots, m$ ，下面给出简单证明

假设问题是线性可分的，即存在 $(w, b)$ ，使得

$$y_i(w\phi(x_i) + b) > 0$$

假设 $y_i(w\phi(x_i) + b)$ 的最小值为 $\gamma$ ，即

$$y_i(w\phi(x_i) + b) \geq \gamma > \frac{1}{2}\gamma$$

整理下得到

$$y_i(w\phi(x_i) + b) > \frac{1}{2}\gamma$$

等式两边同时除以 $\frac{1}{2}\gamma$ ，得到

$$y_i(w'\phi(x_i) + b') > 1$$

其中 $w' = \frac{2}{\gamma}w$ ， $b' = \frac{2}{\gamma}b$ ，以下两个超平面是等价的

$$w\phi(x_i) + b = 0 \iff \frac{2}{\gamma}w\phi(x_i) + \frac{2}{\gamma}b = 0$$

总结一下就是，当问题是线性可分时，即存在 $(w', b')$ 使得 $1 - y_i(w'\phi(x_i) + b') < 0$ ， $i = 1, \dots, m$ ，也就是严格可行的

当强对偶成立时，我们可以得到一些好的性质，即KKT条件，下面我们进行推导  
首先我们假设 $x^*$ 和 $(\alpha^*, \beta^*)$ 分别是原始问题和对偶问题的极值点，即

$$d^* = \max_{\alpha, \beta} \min_x L(x, \alpha, \beta) = \min_x L(x, \alpha^*, \beta^*) = \theta_D(\alpha^*, \beta^*)$$

$$p^* = \min_x \max_{\alpha, \beta} L(x, \alpha, \beta) = \max_{\alpha, \beta} L(x^*, \alpha, \beta) = \theta_P(x^*) = f(x^*)$$

$$d^* = p^*$$

根据以上3个等式，我们可以得到

$$\begin{aligned} f(x^*) &= \theta_D(\alpha^*, \beta^*) \\ &= \min_x L(x, \alpha^*, \beta^*) \\ &= \min_x (f(x) + \sum_{i=1}^m \alpha_i^* g_i(x) + \sum_{j=1}^p \beta_j^* h_j(x)) \\ &\leq f(x^*) + \sum_{i=1}^m \alpha_i^* g_i(x^*) + \sum_{j=1}^p \beta_j^* h_j(x^*) \\ &\leq f(x^*) \end{aligned} \tag{10}$$

因为对偶问题的最优解等于原始问题的最优解，即 $\theta_D(\alpha^*, \beta^*) = f(x^*)$ ，我们需要将最后两个不等号变成等号

- 第1个不等号变成等号：  $L(x, \alpha^*, \beta^*)$ 在 $x^*$ 处取得极值，即 $L(x, \alpha^*, \beta^*)$ 在 $x^*$ 处梯度为0，即 $\nabla L(x^*, \alpha^*, \beta^*) = \nabla f(x^*) + \sum_{i=1}^m \alpha_i^* \nabla g_i(x^*) + \sum_{j=1}^p \beta_j^* \nabla h_j(x^*) = 0$
- 第2个不等号变成等号：  $h_j(x^*)$ 原本就等于0，我们只需要让 $\alpha_i^* g_i(x^*) \leq 0 \rightarrow \alpha_i^* g_i(x^*) = 0$ ，这个是KKT的对偶互补条件
  - 当 $a_i^* > 0$ 时，  $g_i(x^*) = 0$ ，即 $y_i(w\phi(x_i) + b) = 1$ ，  $x_i$ 就是支持向量
  - 当 $g_i(x^*) < 0$ 时，即 $y_i(w\phi(x_i) + b) > 1$ ，得到 $a_i^* = 0$

整理一下，我们得到KKT条件

$$\begin{aligned}
 g_i(x^*) &\leq 0 \\
 h_j(x^*) &= 0 \\
 \alpha_i^* &\geq 0 \\
 \alpha_i^* g_i(x^*) &= 0 \\
 \nabla f(x^*) + \sum_{i=1}^m \alpha_i^* \nabla g_i(x^*) + \sum_{j=1}^p \beta_j^* \nabla h_j(x^*) &= 0
 \end{aligned} \tag{11}$$

前3个条件是我们定义(1)(2)带的约束条件，后2个条件我们由强对偶推KKT(10)产生的

这里再补充一下引入松弛变量 $\xi_i$ 时的KKT的对偶互补条件，下面是引入松弛变量 $\xi_i$ 的原始问题

$$\begin{aligned}
 \min_{w, b, \xi} \quad & \frac{1}{2} \|w\|^2 + C \sum_{i=1}^L \xi_i \\
 s.t. \quad & y_i(w\phi(x_i) + b) \geq 1 - \xi_i \quad i = 1, \dots, L \\
 & \xi_i \geq 0 \quad i = 1, \dots, L
 \end{aligned} \tag{12}$$



原始问题(12)的拉格朗日函数是

$$L(w, b, \xi, \alpha, \beta) = \frac{1}{2} \|w\|^2 + C \sum_{i=1}^L \xi_i - \sum_{i=1}^L \alpha_i (y_i(w\phi(x_i) + b) - 1 + \xi_i) - \sum_{i=1}^L \beta_i \xi_i \quad (13)$$

其中 $\alpha_i$ 和 $\beta_i$ 是关于两个约束条件的拉格朗日乘子，对偶问题是极大极小问题，在求极小问题时，需要 $L(w, b, \xi, \alpha, \beta)$ 对 $\xi$ 求导，我们可以得到 $C - \alpha_i - \beta_i = 0$

根据KKT的对偶互补条件 $\alpha_i g_i(x) = 0$ ，即 $\alpha_i (y_i(w\phi(x_i) + b) - 1 + \xi_i) = 0$ 和 $\beta_i \xi_i = 0$ ，我们可以得到

$$\begin{aligned} \alpha_i = 0 &\Rightarrow \beta_i = C \Rightarrow \xi_i = 0 \Rightarrow y_i(w\phi(x_i) + b) \geq 1 \\ 0 < \alpha_i < C &\Rightarrow 0 < \beta_i < C \Rightarrow \xi_i = 0 \Rightarrow y_i(w\phi(x_i) + b) = 1 \\ \alpha_i = C &\Rightarrow \beta_i = 0 \Rightarrow \xi_i \geq 0 \Rightarrow y_i(w\phi(x_i) + b) \leq 1 \end{aligned} \quad (14)$$

也就是我们可以根据 $\alpha_i$ 的取值来判断该点 $x_i$ 在什么位置

### 1.3.3 为什么要转换为对偶问题

- 自然地引入核函数
- 方便求解，特别是当 $x$ 的维数较高时（可能几千几万维），与之对应的 $w$ 的维数也会很高，在计算 $w^*$ 时计算量大，通过对偶问题，我们只需要求解出 $\alpha^*$ ， $\alpha^*$ 的数量只与支持向量机的数量有关，最终通过 $\alpha^*$ 来计算 $w^*$ ，可以减少计算量
- 目标函数 $f(x)$ 不一定是凸函数，但转换为对偶问题后，对偶函数总是凸函数，具有较好地性质。如下图所示(来自《Convex Optimization》)，左图黑实线是目标函数 $f(x)$ ，显然不是凸函数，最下面的虚线是约束函数 $g(x) \leq 0$ ， $x$ 被约束在了 $[-0.46, 0.46]$ 的区间中，最优解在 $x^* = 0.46$ （黑点）处取得，最小值为 $p^* = 1.54$ ，围绕在黑实线上下的许多虚曲线是拉格朗日函数 $L(x, \lambda)$   $\lambda = 0.1, 0.2, \dots, 1$ ，我们在右图绘制 $d(\lambda) = \min L(x, \lambda)$ ， $\lambda \in [0, 1]$ ，例如：当 $\lambda = 0$ 时，然后我们对 $L(x, 0)$ 取极小，得到一个值为 $d(0) = \min L(x, 0)$ ，然后在右图画上 $(0, d(0))$ 。右图是左图的对偶函数，显然是凸的，我们对它求极大，即 $\max d(\lambda)$ ，极大值在峰顶处取得，为 $d^*$ ，右图中与坐标轴平行的虚线是 $p^*$ ，显然 $d^* \leq p^*$

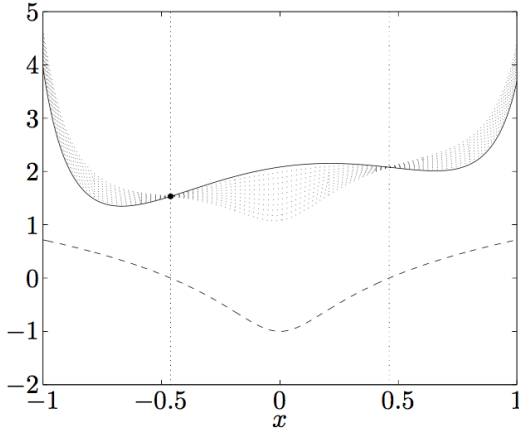

Figure 1: 目标函数 $f(x)$

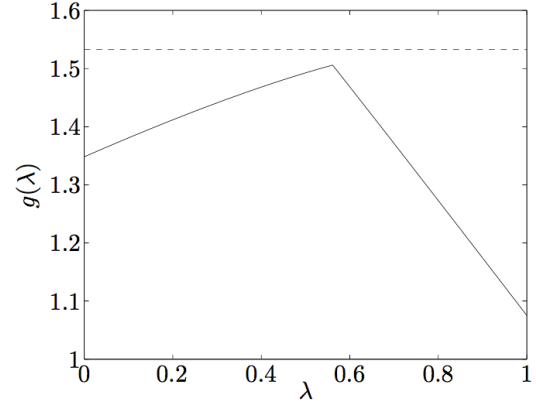

Figure 2: 对偶函数 $d(\lambda)$

## 2 SMO

SMO是SVM的求解利器，可以看到LIBSVM中大部分地实现是围绕SMO来展开的  
下面我们定义一般的原始问题，即含有松弛因子 $\xi$ 的原始问题

$$\begin{aligned}
 \min_{w, b, \xi} \quad & \frac{1}{2} \|w\|^2 + C \sum_{i=1}^L \xi_i \\
 \text{s.t.} \quad & y_i(w\phi(x_i) + b) \geq 1 - \xi_i \quad i = 1, \dots, L \\
 & \xi_i \geq 0 \quad i = 1, \dots, L
 \end{aligned} \tag{15}$$

问题(15)的对偶问题

$$\begin{aligned}
 \min_{\alpha} \quad & f(\alpha) = \frac{1}{2} \sum_{i=1}^L \sum_{j=1}^L \alpha_i \alpha_j y_i y_j K(x_i, x_j) - \sum_{i=1}^L \alpha_i \\
 \text{s.t.} \quad & 0 \leq \alpha_i \leq C \quad i = 1, \dots, L \\
 & \sum_{i=1}^L y_i \alpha_i = 0
 \end{aligned} \tag{16}$$

对偶问题(16)的矩阵形式

$$\begin{aligned}
 \min_{\alpha} \quad & f(\alpha) = \frac{1}{2} \alpha^T Q \alpha - e^T \alpha \\
 \text{s.t.} \quad & 0 \leq \alpha_i \leq C \quad i = 1, \dots, L \\
 & y^T \alpha = 0
 \end{aligned} \tag{17}$$

- $L$ 是所有样本的数量
- $e$ 是一个全为1的单位向量
- $C$ 就是惩罚参数，也是 $\alpha$ 的upper bound
- $Q$ 是一个 $L$ 乘 $L$ 的对称矩阵， $Q_{ij} = y_i y_j K(x_i, x_j)$ ，其中 $K(x_i, x_j)$ 是核函数

原始问题中的最优解 $w^*$ 可以根据对偶问题的最优解 $\alpha^*$ 求解得到，即

$$w^* = \sum_{i=1}^L y_i \alpha_i^* \phi(x_i) \quad (18)$$

原始问题中的最优解 $b^*$ 可以根据KKT条件求得，根据KKT条件(14)，我们有

$$0 < \alpha_i < C \Rightarrow y_i(w^* \phi(x_i) + b^*) = 1$$

然后进一步求得

$$\begin{aligned} b^* &= y_i - w^* \phi(x_i) \\ &= y_i - \sum_{j=1}^L y_j \alpha_j^* \phi(x_j) \phi(x_i) \\ &= y_i - \sum_{j=1}^L y_j \alpha_j^* K(x_j, x_i) \end{aligned} \quad (19)$$

接下来我们需要利用SMO算法进行求解对偶问题(17)的最优解 $\alpha^*$

SMO的核心思想是，在一轮迭代中，不是一次更新 $\alpha$ 的所有分量，而是每次选中 $\alpha$ 两个分量 $i$ 和 $j$ ，固定其他的分量，在子问题上进行优化

SMO算法涉及到两个核心的问题

1. 如何选择 $i$ 和 $j$
2. 如何更新 $\alpha$ ，即选择了 $i$ 和 $j$ 后，如何更新 $\alpha_i$ 和 $\alpha_j$ 使得(17)中的目标函数 $f(\alpha)$ 变小

下面就这两个问题分别进行说明

## 2.1 如何选择i和j

这个问题主要参考《Working Set Selection Using Second Order Information for Training Support Vector Machines》这篇论文

### 2.1.1 基于First Order的方法（一个普遍的做法）

首先解释下什么是First Order，相当于泰勒一阶展开，即梯度对偶问题(17)的拉格朗日函数

$$L(\alpha, \lambda, \mu) = f(\alpha) - \sum_{i=1}^L \lambda_i \alpha_i + \sum_{i=1}^L \mu_i (\alpha_i - C) + \sum_{i=1}^L \eta y^T \alpha \quad (20)$$

其中 $\lambda_i > 0$ 和 $\mu_i > 0$ ，若 $\alpha$ 为极值点的话，我们可以得到 $\nabla L(\alpha, \lambda, \mu) = 0$ ，即 $\nabla f(\alpha) - \lambda + \mu + \eta y = 0$ ，整理后得到

$$\nabla f(\alpha) + \eta y = \lambda - \mu \quad (21)$$

其中

$$\begin{aligned} \nabla f(\alpha) &= Q\alpha - e \\ \nabla f(\alpha)_i &= \sum_{j=1}^L \alpha_j y_i y_j K(x_i, x_j) - 1 \end{aligned} \quad (22)$$

根据KKT的对偶互补条件，我们可以得到

$$\lambda_i \alpha_i = 0 \quad (23)$$

$$\mu_i (C - \alpha_i) = 0 \quad (24)$$

根据(21)(23)(24)，我们可以得到

$$\begin{aligned} \nabla f(\alpha)_i + \eta y_i &\geq 0 & \text{if } \alpha_i < C \\ \nabla f(\alpha)_i + \eta y_i &\leq 0 & \text{if } \alpha_i > 0 \end{aligned} \quad (25)$$

(25)的解释如下

当 $\alpha < C$ 时,  $C - \alpha > 0$ , 根据(24)得到 $\mu = 0$ , 又因 $\lambda \geq 0$ , 所以 $\lambda - \mu \geq 0$ , 根据(21)得到 $\nabla f(\alpha) + \eta y \geq 0$

当 $\alpha > 0$ 时, 根据(23)得到 $\lambda = 0$ , 又因 $\mu \geq 0$ , 所以 $\lambda - \mu \leq 0$ , 根据(21)得到 $\nabla f(\alpha) + \eta y \leq 0$

下面我们证明下, 这里的 $\eta$ 其实就是截距 $b$

当 $0 < \alpha_i < C$ 时, 根据(25), 我们有

$$\nabla f(\alpha)_i + \eta y_i = 0 \quad \text{if } 0 < \alpha_i < C$$

变形后可以得到

$$\eta = -y_i \nabla f(\alpha)_i \quad \text{if } 0 < \alpha_i < C \quad (26)$$

根据(14)中的

$$0 < \alpha_i < C \Rightarrow y_i(w\phi(x_i) + b) = 1$$

以及(18)和(22), 我们可以得到

$$\begin{aligned} b &= y_i - w\phi(x_i) \\ &= y_i - \sum_{j=1}^L \alpha_j y_j K(x_j, x_i) \\ &= -y_i \nabla f(\alpha)_i \quad \text{if } 0 < \alpha_i < C \end{aligned} \quad (27)$$

根据以及(26)和以及(27), 我们发现当 $0 < \alpha_i < C$ 时

$$\eta = b$$

同理可证 (其他情况 $\alpha_i = 0$ 和 $\alpha_i = C$ ) , 接下来, 我们就用 $b$ 去替换 $\eta$

接下来我们定义两个集合, 这两个集合是关于 $\alpha_t$ 下标 $t$ 的集合

$$\begin{aligned} I_{up}(\alpha) &= \{t | \alpha_t < C, y_t = 1 \text{ or } \alpha_t > 0, y_t = -1\} \\ I_{low}(\alpha) &= \{t | \alpha_t < C, y_t = -1 \text{ or } \alpha_t > 0, y_t = 1\} \end{aligned} \quad (28)$$

因为 $y_i = \pm 1$ ，我们可以结合以及(28)，将以及(25)改写一下（左右两边同乘 $y_i$ ）

$$\begin{aligned} -y_i \nabla f(\alpha)_i &\leq b, \forall_i \in I_{up}(\alpha) \\ -y_j \nabla f(\alpha)_j &\geq b, \forall_j \in I_{low}(\alpha) \end{aligned} \quad (29)$$

将以及(29)合并一下得到

$$-y_i \nabla f(\alpha)_i \leq b \leq -y_j \nabla f(\alpha)_j \quad i \in I_{up} \text{ and } j \in I_{low} \quad (30)$$

我们令

$$\begin{aligned} m(\alpha) &= \max_{i \in I_{up}(\alpha)} -y_i \nabla f(\alpha)_i \\ M(\alpha) &= \min_{j \in I_{low}(\alpha)} -y_j \nabla f(\alpha)_j \end{aligned} \quad (31)$$

一个合理驻点 $\alpha$ 需要满足

$$m(\alpha) \leq M(\alpha) \quad (32)$$

下面我们给出“违反对(violating pair)”的定义

如果 $i \in I_{up}(\alpha), j \in I_{low}(\alpha)$ , and  $-y_i \nabla f(\alpha)_i > -y_j \nabla f(\alpha)_j$ , 那么 $\{i, j\}$ 就是一个违反对（ $\alpha_i$ 和 $\alpha_j$ 的下标）

一个普遍的做法就是每次迭代挑选“最大违反对(maximal violating pair)”，即

$$\begin{aligned} i &\in \arg \max_t \{ -y_t \nabla f(\alpha^k)_t \mid t \in I_{up}(\alpha^k) \} \\ j &\in \arg \max_t \{ -y_t \nabla f(\alpha^k)_t \mid t \in I_{low}(\alpha^k) \} \end{aligned} \quad (33)$$

因为最优的 $\alpha$ 需要满足 $m(\alpha) \leq M(\alpha)$ ，如果违反了，它就是不是最优的，所以每次找出这个“最大违反对”，然后更新它们的值

最后我们再设置一个停止条件，即 $m(\alpha^k) - M(\alpha^k) < \epsilon$ ，这里 $\epsilon$ 称为容忍值，如果在第 $k$ 轮的时候， $m(\alpha^k)$ 没有比 $M(\alpha^k)$ 大太多的话，就停止

可以证明，这种挑选方法是利用了 $f(\alpha)$ 的一阶信息，具体证明请见论文

### 2.1.2 基于Second Order的方法 (LIBSVM)

LIBSVM的working set selection是根据second order information来选择的，其中i的选择与first order一样，与first order不一样的是j的选择，j除了是违反对之外，还需要它使目标函数减少最多，second order自然要比first order要好，这就好比牛顿法(second order) 要比梯度下降 (first order) 快

接下来的问题就是我们要找到一个j

根据泰勒公式在 $\alpha^k$ 处地二阶展开，我们得到

$$\begin{aligned} f(\alpha^k + d) &= f(\alpha^k) + \nabla f(\alpha^k)^T d + \frac{1}{2} d^T \nabla^2 f(\alpha^k) d \\ &= f(\alpha^k) + \nabla f(\alpha^k)_B^T d_B + \frac{1}{2} d_B^T \nabla^2 f(\alpha^k)_{BB} d_B \end{aligned} \quad (34)$$

其中 $B = \{i, j\}$ ，注意这里的变量只有 $\alpha_i$ 和 $\alpha_j$ ，所以对其他 $\alpha_t, t \neq i \text{ and } t \neq j$ 的导数为0，直接舍去，我们只取含有B的分量

我们定义一个子问题，这个子问题只跟B有关，即 $\alpha_i$ 和 $\alpha_j$ 有关

$$\begin{aligned} Sub(B) &= f(\alpha^k + d) - f(\alpha^k) \\ &= \nabla f(\alpha^k)_B^T d_B + \frac{1}{2} d_B^T \nabla^2 f(\alpha^k)_{BB} d_B \end{aligned} \quad (35)$$

我们的目标就是让Sub(B)越小越好，即希望 $\alpha^k$ 加上偏移量 $d$ ， $f(\alpha^k + d)$ 的值能够比更新之前 $f(\alpha^k)$ 要小，也就是 $f(\alpha^k + d) < f(\alpha^k)$ ，整个问题就变成

$$\begin{aligned} \min_{d_B} \quad & \nabla f(\alpha^k)_B^T d_B + \frac{1}{2} d_B^T \nabla^2 f(\alpha^k)_{BB} d_B \\ \text{s.t.} \quad & y_B^T d_B = 0 \\ & d_t \geq 0, \text{ if } a_t^k = 0, t \in B \\ & d_t \leq 0, \text{ if } a_t^k = C, t \in B \end{aligned} \quad (36)$$

这里解释下以及(36)的约束条件，因为

$$\begin{cases} y_i \alpha_i + y_j \alpha_j = Constant \\ y_i (\alpha_i + d_i) + y_j (\alpha_j + d_j) = Constant \end{cases}$$

所以

$$y_i d_i + y_j d_j = 0 \Rightarrow y_B^T d_B = 0$$

又因为

$$0 \leq \alpha_i \leq C$$

$$0 \leq \alpha_i + d_i \leq C$$

所以

$$-\alpha_i \leq d_i \leq C - \alpha_i$$

即当 $\alpha_i = 0$ 时,  $d_i \geq 0$ , 当 $\alpha_i = C$ 时,  $d_i \leq 0$

定理: 如果 $B = \{i, j\}$ 是一个违反对且 $K_{ii} + K_{jj} - 2K_{ij} > 0$ , 上述问题能够取得的最小值是

$$-\frac{(-y_i \nabla f(\alpha^k)_i + y_i \nabla f(\alpha^k)_j)^2}{2(K_{ii} + K_{jj} - 2K_{ij})} \quad (37)$$

证明如下, 首先定义

$$\begin{cases} \hat{d}_i = y_i d_i \\ \hat{d}_j = y_j d_j \end{cases}$$

因为以及(36)

$$y_B^T d_B = 0$$

所以

$$\hat{d}_i = -\hat{d}_j$$

我们再定义几个记号, 根据(22)我们知道

$$\nabla f(\alpha)_i = \sum_{j=1}^L \alpha_j y_i y_j K(x_i, x_j) - 1$$

定义

$$Q_{ii} = \frac{\nabla f(\alpha)_i}{\nabla \alpha_i} = y_i y_i K(x_i, x_i)$$

$$Q_{ij} = \frac{\nabla f(\alpha)_i}{\nabla \alpha_i} = y_i y_j K(x_i, x_j)$$



$$Q_{ji} = \frac{\nabla f(\alpha)_j}{\nabla \alpha_i} = y_j y_i K(x_j, x_i)$$

$$Q_{jj} = \frac{\nabla f(\alpha)_j}{\nabla \alpha_j} = y_j y_j K(x_j, x_j)$$

接下来，我们将(36)的目标函数改写一下

$$\begin{aligned} sub(B) &= \nabla f(\alpha^k)^T d_B + \frac{1}{2} d_B^T \nabla^2 f(\alpha^k)_{BB} d_B \\ &= \frac{1}{2} \begin{bmatrix} d_i & d_j \end{bmatrix} \begin{bmatrix} \frac{\nabla f(\alpha)_i}{\nabla \alpha_i} & \frac{\nabla f(\alpha)_i}{\nabla \alpha_j} \\ \frac{\nabla f(\alpha)_j}{\nabla \alpha_i} & \frac{\nabla f(\alpha)_j}{\nabla \alpha_j} \end{bmatrix} \begin{bmatrix} d_i \\ d_j \end{bmatrix} + \begin{bmatrix} \nabla f(\alpha^k)_i & \nabla f(\alpha^k)_j \end{bmatrix} \begin{bmatrix} d_i \\ d_j \end{bmatrix} \\ &= \frac{1}{2} \begin{bmatrix} d_i & d_j \end{bmatrix} \begin{bmatrix} Q_{ii} & Q_{ij} \\ Q_{ji} & Q_{jj} \end{bmatrix} \begin{bmatrix} d_i \\ d_j \end{bmatrix} + \begin{bmatrix} \nabla f(\alpha^k)_i & \nabla f(\alpha^k)_j \end{bmatrix} \begin{bmatrix} d_i \\ d_j \end{bmatrix} \\ &= \frac{1}{2} (d_i^2 y_i^2 K_{ii} + d_i d_j y_i y_j K_{ij} + d_j d_i y_j y_i K_{ji} + d_j^2 y_j^2 K_{jj}) + (\nabla f(\alpha)_i d_i + \nabla f(\alpha)_j d_j) \\ &= \frac{1}{2} [(d_i y_i)^2 K_{ii} - 2(d_j y_j)^2 K_{ij} + (d_j y_j)^2 K_{jj}] + (\nabla f(\alpha)_i d_i y_i^2 + \nabla f(\alpha)_j d_j y_j^2) \\ &= \frac{1}{2} (K_{ii} + K_{jj} - 2K_{ij}) \hat{d}_j^2 + (-y_i \nabla f(\alpha^k)_i + y_j \nabla f(\alpha^k)_j) \hat{d}_j \end{aligned} \tag{38}$$

因为我们假设  $K_{ii} + K_{jj} - 2K_{ij} > 0$ ，且B是违反对，即  $-y_i \nabla f(\alpha)_i > -y_j \nabla f(\alpha)_j$ ，我们定义

$$\begin{aligned} a_{ij} &= K_{ij} + K_{jj} - 2K_{ij} > 0 \\ b_{ij} &= -y_i \nabla f(\alpha)_i + y_j \nabla f(\alpha)_j > 0 \end{aligned} \tag{39}$$

将以及(39)带入以及(38)，我们可以得到

$$\begin{aligned} &\frac{1}{2} (K_{ii} + K_{jj} - 2K_{ij}) \hat{d}_j^2 + (-y_i \nabla f(\alpha^k)_i + y_j \nabla f(\alpha^k)_j) \hat{d}_j \\ &= \frac{1}{2} a_{ij} \hat{d}_j^2 + b_{ij} \hat{d}_j \end{aligned} \tag{40}$$

标准的二次函数  $f(x) = ax^2 + bx + c$ ，极值点在  $x = -\frac{b}{2a}$  处取得，极值为  $y = \frac{4ac-b^2}{4a}$

在该问题中，极值点在  $\hat{d}_j = -\frac{b_{ij}}{2 \cdot \frac{1}{2} a_{ij}} = -\frac{b_{ij}}{a_{ij}}$  处取得，极值为  $\frac{0-b_{ij}^2}{4 \cdot \frac{1}{2} a_{ij}} = -\frac{b_{ij}^2}{2a_{ij}}$ ，  
即  $-\frac{(-y_i \nabla f(\alpha^k)_i + y_j \nabla f(\alpha^k)_j)^2}{2(K_{ii} + K_{jj} - 2K_{ij})}$

整理下，我们可以得到

$$\begin{aligned} d_j &= y_j \hat{d}_j = -y_j \frac{b_{ij}}{a_{ij}} \\ d_i &= y_i \hat{d}_i = -y_i \hat{d}_j = -y_i \left(-\frac{b_{ij}}{a_{ij}}\right) = y_i \frac{b_{ij}}{a_{ij}} \end{aligned} \quad (41)$$

因此 $j$ 的选择就是

$$j \in \arg \min_t \left\{ -\frac{b_{it}^2}{a_{it}} \mid t \in I_{low}(\alpha^k), -y_t \nabla f(\alpha)_t < -y_i \nabla f(\alpha)_i \right\} \quad (42)$$

以上就是原理部分，下面我们具体来看下LIBSVM源码中的具体实现，对应的部分是select\_working\_set这个函数

#### Part1. 定义相关变量

```
double Gmax = -INF;
double Gmax2 = -INF;
int Gmax_idx = -1;
int Gmin_idx = -1;
double obj_diff_min = INF;
```

- Gmax  $\iff m(\alpha) = \max_{i \in I_{up}(\alpha)} -y_i \nabla f(\alpha)_i$
- Gmax2  $\iff -M(\alpha) = \max_{j \in I_{low}(\alpha)} y_j \nabla f(\alpha)_j$
- Gmax\_idx  $\iff i$
- Gmin\_idx  $\iff j$
- obj\_diff\_min  $\iff f(\alpha)$ 的极小值，我们需要记录取得极小值时的 $j$

## Part2. 选择 $i$

```
for (int t = 0; t < active_size; t++) {
    if (y[t] == +1) {
        if (!is_upper_bound(t)) {
            // y_t = 1 and a_t < C
            if (-G[t] >= Gmax) {
                Gmax = -G[t];
                Gmax_idx = t;
            }
        }
    } else {
        if (!is_lower_bound(t)) {
            // y_t = -1 and a_t > 0
            if (G[t] >= Gmax) {
                Gmax = G[t];
                Gmax_idx = t;
            }
        }
    }
}
```

- $i$ 的选择只能来自于 $I_{up}(\alpha) = \{t | \alpha_t < C, y_t = 1 \text{ or } \alpha_t > 0, y_t = -1\}$ , 对应两个注释的地方
- $G[t] \iff \nabla f(\alpha)_i$ 
  - 当 $y_i = 1$ 时,  $-G[t] = -\nabla f(\alpha)_i = -y_i \nabla f(\alpha)_i$
  - 当 $y_i = -1$ 时,  $G[t] = \nabla f(\alpha)_i = -y_i \nabla f(\alpha)_i$
- $Gmax\_idx = t \iff$  (33)中 $i$ 的选择

### Part3. 选择 $j$

```
for (int j = 0; j < active_size; j++) {
    if (y[j] == +1) {
        if (!is_lower_bound(j)) {
            // y_j = 1 and a_j > 0
            double grad_diff = Gmax + G[j];
            if (G[j] >= Gmax2)
                Gmax2 = G[j];
            if (grad_diff > 0) {
                double obj_diff;
                double quad_coef = QD[i]+QD[j]-2.0*y[i]*Q_i[j];
                if (quad_coef > 0)
                    obj_diff=-(grad_diff*grad_diff)/quad_coef;
                else
                    obj_diff=-(grad_diff*grad_diff)/TAU;
                if (obj_diff <= obj_diff_min) {
                    Gmin_idx=j;
                    obj_diff_min = obj_diff;
                }
            }
        }
    }
    else {
        if (!is_upper_bound(j)) {
            // y_j = -1 and a_j > 0
            double grad_diff= Gmax-G[j];
            if (-G[j] >= Gmax2)
                Gmax2 = -G[j];
            if (grad_diff > 0) {
                double obj_diff;
                double quad_coef = QD[i]+QD[j]+2.0*y[i]*Q_i[j];
                if (quad_coef > 0)
```

```

        obj_diff=-(grad_diff*grad_diff)/quad_coef;
    else
        obj_diff=-(grad_diff*grad_diff)/TAU;
    if (obj_diff <= obj_diff_min) {
        Gmin_idx=j;
        obj_diff_min = obj_diff;
    }
}
}
}
}
}
}
}

```

- $j$  的选择只能来自于  $I_{low}(\alpha) = \{t | \alpha_t < C, y_t = -1 \text{ or } \alpha_t > 0, y_t = 1\}$ , 对应两个注释的地方
- $\text{grad\_diff} = G_{\max} \pm G[j] \iff b_{ij} = -y_i \nabla f(\alpha)_i + y_j \nabla f(\alpha)_j$
- $\text{grad\_diff} > 0 \iff -y_i \nabla f(\alpha)_i > -y_j \nabla f(\alpha)_j$
- $\text{quad\_coef} \iff a_{ij} = K_{ij} + K_{jj} - 2K_{ij}$ , 字面意思应该是二次项的系数
- $\text{if}(\text{obj\_diff} \leq \text{obj\_diff\_min}) \iff j \in \arg \min_t \{-\frac{b_{it}^2}{a_{it}} \mid t \in I_{low}(\alpha^k), -y_t \nabla f(\alpha)_t < -y_i \nabla f(\alpha)_i\}$
- $\text{obj\_diff\_min} \iff -\frac{b_{ij}^2}{2a_{ij}} = -\frac{(-y_i \nabla f(\alpha^k)_i + y_i \nabla f(\alpha^k)_j)^2}{2(K_{ii} + K_{jj} - 2K_{ij})}$ , 忽略掉系数2

#### Part4. 判断停止以及返回(i, j)

```

if(Gmax+Gmax2 < eps || Gmin_idx == -1)
    return 1;
out_i = Gmax_idx;
out_j = Gmin_idx;
return 0;

```

- $G_{\max} + G_{\max 2} < \epsilon$  对应于  $m(\alpha^k) - M(\alpha^k) < \epsilon$

## 2.2 如何更新 $\alpha$

接下来的内容主要参考《LIBSVM: A Library for Support Vector Machines》原文的内容

2.1节我们阐述了如何选择违反对，但是我们最终的目的是要找到一个最优的 $\alpha^T = [\alpha_1, \alpha_2, \dots, \alpha_L]$ ，现在我们只是找到了 $\alpha_i$ 和 $\alpha_j$ ，所以我们需要在每轮迭代中更新这两个变量，使得目标函数变小，在程序实现中，还需要更新其他辅助参数，例如在LIBSVM中，我们还需要更新变量G和G\_bar

### 2.2.1 更新 $\alpha$

我们将问题(36)重新改写成下面形式

$$\begin{aligned} \min_{d_i, d_j} \quad & \frac{1}{2} \begin{bmatrix} d_i & d_j \end{bmatrix} \begin{bmatrix} Q_{ii} & Q_{ij} \\ Q_{ji} & Q_{jj} \end{bmatrix} \begin{bmatrix} d_i \\ d_j \end{bmatrix} + \begin{bmatrix} \nabla f(\alpha^k)_i & \nabla f(\alpha^k)_j \end{bmatrix} \begin{bmatrix} d_i \\ d_j \end{bmatrix} \\ \text{s.t.} \quad & y_i d_i + y_j d_j = 0 \\ & -\alpha_i^k \leq d_i \leq C_i - \alpha_i^k \\ & -\alpha_j^k \leq d_j \leq C_j - \alpha_j^k \end{aligned} \tag{43}$$

根据以及(41)，我们得到

$$\begin{aligned} a_i^{k+1} &= a_i^k + d_i = a_i^k + y_i \frac{b_{ij}}{a_{ij}} \\ a_j^{k+1} &= a_j^k + d_j = a_j^k - y_j \frac{b_{ij}}{a_{ij}} \end{aligned} \tag{44}$$

这里上标k代表第k轮，下面分两种情况进行讨论

(1) 第一种情况 $y_i \neq y_j$

$$\begin{aligned} \alpha_i^{k+1} &= \alpha_i^k + y_i \frac{b_{ij}}{a_{ij}} \\ &= \alpha_i^k + y_i \frac{(-y_i \nabla f(\alpha)_i + y_j \nabla f(\alpha)_j)}{a_{ij}} \\ &= \alpha_i^k + \frac{-\nabla f(\alpha)_i - \nabla f(\alpha)_j}{a_{ij}} \end{aligned} \tag{45}$$

$$\begin{aligned}
\alpha_j^{k+1} &= \alpha_j^k - y_j \frac{b_{ij}}{a_{ij}} \\
&= \alpha_j^k - y_j \frac{(-y_i \nabla f(\alpha)_i + y_j \nabla f(\alpha)_j)}{a_{ij}} \\
&= \alpha_j^k + \frac{-\nabla f(\alpha)_i - \nabla f(\alpha)_j}{a_{ij}}
\end{aligned} \tag{46}$$

我们定义

$$delta_{y_i \neq y_j} = \frac{-\nabla f(\alpha)_i - \nabla f(\alpha)_j}{a_{ij}} \tag{47}$$

(2) 第二种情况  $y_i = y_j$

$$\begin{aligned}
\alpha_i^{k+1} &= \alpha_i^k + y_i \frac{b_{ij}}{a_{ij}} \\
&= \alpha_i^k + y_i \frac{(-y_i \nabla f(\alpha)_i + y_j \nabla f(\alpha)_j)}{a_{ij}} \\
&= \alpha_i^k + \frac{-\nabla f(\alpha)_i + \nabla f(\alpha)_j}{a_{ij}} \\
&= \alpha_i^k - \frac{\nabla f(\alpha)_i - \nabla f(\alpha)_j}{a_{ij}}
\end{aligned} \tag{48}$$

$$\begin{aligned}
\alpha_j^{k+1} &= \alpha_j^k - y_j \frac{b_{ij}}{a_{ij}} \\
&= \alpha_j^k - y_j \frac{(-y_i \nabla f(\alpha)_i + y_j \nabla f(\alpha)_j)}{a_{ij}} \\
&= \alpha_j^k + \frac{\nabla f(\alpha)_i - \nabla f(\alpha)_j}{a_{ij}}
\end{aligned} \tag{49}$$

我们定义

$$delta_{y_i = y_j} = \frac{\nabla f(\alpha)_i - \nabla f(\alpha)_j}{a_{ij}} \tag{50}$$

下面我们还是继续讨论 (1)  $y_i \neq y_j$  的情况,  $y_i = y_j$  同理

因为  $\sum_{i=1}^L \alpha_i y_i = 0$  的约束, 所以

$$y_i \alpha_i^k + y_j \alpha_j^k = y_i \alpha_i^{k+1} + y_j \alpha_j^{k+1} = \text{constant}$$

又因为  $y_i \neq y_j$ , 我们有

$$\begin{aligned} y_i y_i \alpha_i^k + y_i y_j \alpha_j^k &= \alpha_i^k - \alpha_j^k = \text{constant}' \\ y_i y_i \alpha_i^{k+1} + y_i y_j \alpha_j^{k+1} &= \alpha_i^{k+1} - \alpha_j^{k+1} = \text{constant}' \end{aligned} \quad (51)$$

然后我们有

$$\alpha_i^k - \alpha_j^k = \alpha_i^{k+1} - \alpha_j^{k+1} = \text{constant}'$$

最终我们有

$$\alpha_i^{k+1} - \alpha_i^k = \alpha_j^{k+1} - \alpha_j^k \quad (52)$$

如下图所示,  $\alpha_i^{k+1}, \alpha_j^{k+1}$  的取值也是有约束的,  $(\alpha_i^{k+1}, \alpha_j^{k+1})$  必须在中间的矩形中, 不合理的区域是在下图的4个区域中 (region I, region II, region III, region IV), 不可能在NA区域中 (即左上角和右下角), 所以整个候选区域是在中间矩形+4个区域, 合理的只有矩形, 如果落在了4个区域中, 我们要做一些clipping的工作

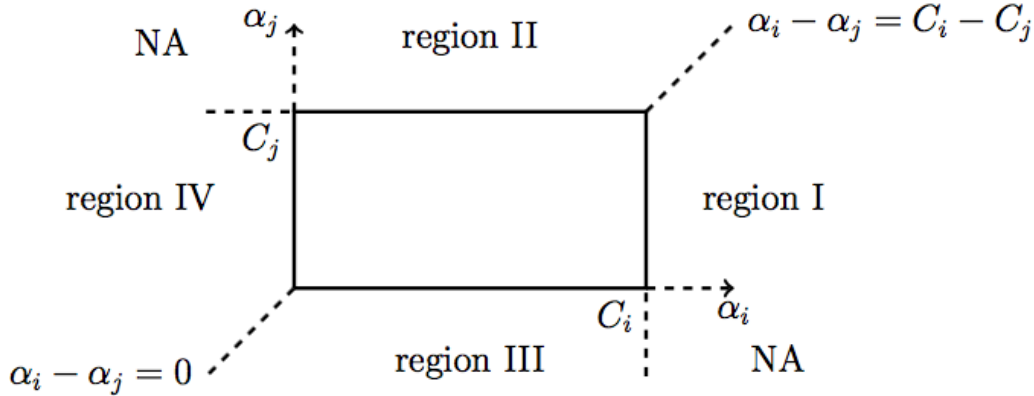



我们对这幅图解释一下，首先我们看看 $\alpha_i - \alpha_j$ 的取值范围

$$\begin{cases} 0 \leq \alpha_i^k \leq C_i \\ 0 \leq \alpha_j^k \leq C_j \end{cases} \Rightarrow \begin{cases} 0 \leq \alpha_i^k \leq C_i \\ -C_j \leq -\alpha_j^k \leq 0 \end{cases}$$

$$\Rightarrow -C_j \leq \alpha_i^k - \alpha_j^k \leq C_i \quad (53)$$

这说明 $\alpha_i^k - \alpha_j^k$ 的取值是有范围的（ $-C_j \leq \alpha_i - \alpha_j \leq C_i$ ），该约束与k无关，即不管k是在第几轮迭代， $\alpha_i^k - \alpha_j^k$ 必须满足这个约束

(1) 左上角NA区域

$$\alpha_i < 0 \text{ and } \alpha_j > C_j \Rightarrow \alpha_i - \alpha_j < -C_j$$

与(53)矛盾

(2) 右下角NA区域

$$\alpha_i > C_i \text{ and } \alpha_j < 0 \Rightarrow \alpha_j - \alpha_i < -C_i \Rightarrow \alpha_i - \alpha_j > C_i$$

与(53)矛盾

(3) region I, 在这个区域，我们有

$$\begin{cases} \alpha_i - \alpha_j > C_i - C_j \\ a_i > C_i \end{cases}$$

由于 $a_i > C_i$ ，也就是 $a_i$ 超出了矩形区域，我们让 $a_i$ 落回到矩形区域的边缘，即让 $a_i^{k+1} = C_i$ ，因为(52)即 $\alpha_i^{k+1} - \alpha_i^k = \alpha_j^{k+1} - \alpha_j^k$ ，我们将 $a_i^{k+1} = C_i$ 带入 $\alpha_i^{k+1} - \alpha_i^k = \alpha_j^{k+1} - \alpha_j^k$ ，得到

$$\begin{cases} a_i^{k+1} = C_i \\ \alpha_j^{k+1} = C_i - \alpha_i^k + \alpha_j^k = C_i - (\alpha_i^k - \alpha_j^k) \end{cases}$$

(4) region *II*, 在这个区域, 我们有

$$\begin{cases} \alpha_i - \alpha_j < C_i - C_j \\ \alpha_j > C_j \end{cases}$$

我们让

$$\begin{cases} \alpha_j^{k+1} = C_j \\ \alpha_i^{k+1} = C_j + \alpha_i^k - \alpha_j^k \end{cases}$$

(5) region *III*, 在这个区域, 我们有

$$\begin{cases} \alpha_i - \alpha_j > 0 \\ a_j < 0 \end{cases}$$

我们让

$$\begin{cases} \alpha_j^{k+1} = 0 \\ \alpha_i^{k+1} = \alpha_i^k - \alpha_j^k \end{cases}$$

(6) region *IV*, 在这个区域, 我们有

$$\begin{cases} \alpha_i - \alpha_j < 0 \\ \alpha_i < 0 \end{cases}$$

我们让

$$\begin{cases} \alpha_i^{k+1} = 0 \\ \alpha_j^{k+1} = -(\alpha_i^k - \alpha_j^k) \end{cases}$$

以上就是原理部分，下面我们具体来看下LIBSVM源码中的具体实现，对应的部分是Solve这个函数，注意下面给出的是 $y_i \neq y_j$ 的情况

```
if (y[i]!=y[j]) {
    double quad_coef = QD[i]+QD[j]+2*Q_i[j];
    if (quad_coef <= 0)
        quad_coef = TAU;
    double delta = (-G[i]-G[j])/quad_coef;
    double diff = alpha[i] - alpha[j];

    // rectangle
    alpha[i] += delta;
    alpha[j] += delta;

    // case of 4 region
    if(diff > 0) {
        if(alpha[j] < 0) { // region 3
            alpha[j] = 0;
            alpha[i] = diff;
        }
    } else {
        if (alpha[i] < 0) { // region 4
            alpha[i] = 0;
            alpha[j] = -diff;
        }
    }
    if (diff > C_i - C_j) {
        if (alpha[i] > C_i) { // region 1
            alpha[i] = C_i;
            alpha[j] = C_i - diff;
        }
    } else {
```

```

        if(alpha[j] > C_j) { // region 2
            alpha[j] = C_j;
            alpha[i] = C_j + diff;
        }
    }
}

```

- quad\_coef  $\iff a_{ij} = K_{ij} + K_{jj} - 2K_{ij}$
- delta  $\iff \text{delta}_{y_i \neq y_j} = \frac{-\nabla f(\alpha)_i - \nabla f(\alpha)_j}{a_{ij}}$
- diff  $\iff \alpha_i - \alpha_j$ , 因为我们要判断 $\alpha_i - \alpha_j$ 的取值范围
- alpha[i] += delta;  $\iff \alpha_i^{k+1} = \alpha_i^k + \frac{-\nabla f(\alpha)_i - \nabla f(\alpha)_j}{a_{ij}}$
- alpha[j] += delta;  $\iff \alpha_j^{k+1} = \alpha_j^k + \frac{-\nabla f(\alpha)_i - \nabla f(\alpha)_j}{a_{ij}}$

## 2.3 更新辅助变量

### 2.3.1 更新G

```

double delta_alpha_i = alpha[i] - old_alpha_i;
double delta_alpha_j = alpha[j] - old_alpha_j;

for (int k = 0; k < active_size; k++) {
    G[k] += Q_i[k]*delta_alpha_i + Q_j[k]*delta_alpha_j;
}

```

- G[t]  $\iff \nabla f(\alpha)_i = \sum_{j=1}^L \alpha_j y_i y_j K(x_i, x_j) - 1$
- Q\_i[k]  $\iff y_i y_j K(x_i, x_j)$
- G[k]的更新相当于，除了 $\alpha_i$ 和 $\alpha_j$ ，其他 $\alpha_t$ 都没有改变，然后将 $\alpha_i$ 和 $\alpha_j$ 的改变量(delta\_alpha\_i和delta\_alpha\_j)更新到G[k]

### 2.3.2 更新G\_bar和alpha的状态

G我们已经说完了，就是 $\nabla f(\alpha)$ ，这里需要解释下G\_bar是什么东西

首先我们来看看 $\alpha_i$ 取值在训练过程中的变化

在训练过程中，当 $\alpha_i$ 到达了边界，即 $\alpha_i = 0$ 或 $\alpha_i = C$ ， $\alpha_i$ 的值就不会改变了，它们的状态应该是inactive，而对于 $0 < \alpha_i < C$ 的那些 $\alpha_i$ ，它们的状态是active的，这些 $i \in A$ ，集合A的大小为active.size，在每一轮中都要检测active size中的 $\alpha_i$ ，如果它们到达了边界，要把它们inactive

我们更新G，其实只更新active的 $\alpha_i$ 梯度，即 $\nabla f(\alpha)_i$ ，对于那些inactive的 $\alpha_i$ ，我们为了加速计算，我们用 $\bar{G}$ ，也就是G\_bar来存储，解释如下

首先定义

$$\bar{G} = C \sum_{j: \alpha_j = C} Q_{ij}, \quad i = 1, \dots, L \quad (54)$$

对于 $i \notin A$ ，即那些inactive的 $\alpha_i$ ，我们需要计算它们的梯度，根据(22)，我们有

$$\begin{aligned} \nabla f(\alpha)_i &= \sum_{j=1}^L Q_{ij} \alpha_j + e_i \\ &= \sum_{\alpha_j=0} Q_{ij} * 0 + \sum_{\alpha_j=C} Q_{ij} * C + \sum_{0 < \alpha_j < C} Q_{ij} \alpha_j + e_i \\ &= \sum_{\alpha_j=C} Q_{ij} * C + \sum_{0 < \alpha_j < C} Q_{ij} \alpha_j + e_i \\ &= \bar{G}_i + \sum_{0 < \alpha_j < C} Q_{ij} \alpha_j + e_i \end{aligned} \quad (55)$$

提前计算好 $\bar{G}$ ，这样就可以帮助我们加速计算梯度，下面我们来看下代码

```
bool ui = is_upper_bound(i);
bool uj = is_upper_bound(j);
update_alpha_status(i);
update_alpha_status(j);
int k;
if (ui != is_upper_bound(i)) {
```

```

    Q_i = Q.get_Q(i, l);
    if(ui) {
        for(k=0;k<l;k++)
            G_bar[k] -= C_i * Q_i[k];
    } else {
        for(k=0;k<l;k++)
            G_bar[k] += C_i * Q_i[k];
    }
}

if (uj != is_upper_bound(j)) {
    Q_j = Q.get_Q(j, l);
    if (uj) {
        for(k=0;k<l;k++)
            G_bar[k] -= C_j * Q_j[k];
    } else {
        for(k=0;k<l;k++)
            G_bar[k] += C_j * Q_j[k];
    }
}

```

- $ui \neq \text{is\_upper\_bound}(i)$ 成立说明 $i$ 的状态前后必须有变化
- $\text{if}(ui)$ 成立说明 $i$ 以前是upper bound, 现在不是upper bound, 也就是现在 $\alpha_i \neq C$ , 所以从 $k \in \{1, 2, \dots, L\}$ 上的 $G\_bar$ 都要减掉 $C \cdot Q_{ij}$ , 对应代码就是 $G\_bar[k] -= C_i * Q_i[k]$ , 同理, 其他对应模块

### 3 参数 $w$ 和 $b$

#### 3.1 计算参数 $w$

根据(18), 我们知道

$$w^* = \sum_{i=1}^L y_i \alpha_i^* \phi(x_i)$$

但我们这里并不需要显式地存储 $w$ , 因为决策函数是

$$\text{sign}(w^T \phi(x) + b) = \text{sign}\left(\sum_{i=1}^L y_i \alpha_i K(x_i, x) + b\right) \quad (56)$$

我们只需要存储 $y_i \alpha_i$ 和 $b$ 即可

#### 3.2 计算参数 $b$

C-SVC和 $\epsilon$ -SVR中的 $b$ 和one-class SVM中的 $-\rho$ 是等价的, 即 $b = -\rho$ , 在LIBSVM中存储的其实是 $\rho$

根据(19), 我们知道

$$b^* = y_i - \sum_{j=1}^L y_j \alpha_j^* K(x_j, x_i)$$

这里我们只是用了一个支持向量机 $x_i (0 < \alpha_i < C)$ , 在LIBSVM中是取了所有的支持向量机, 最后取平均值, 即

$$\begin{aligned} b^* &= \frac{\sum_{i: 0 < \alpha_i < C} (y_i - \sum_{j=1}^L y_j \alpha_j K(x_j, x_i))}{|\{i \mid 0 < \alpha_i < C\}|} \\ &= \frac{\sum_{i: 0 < \alpha_i < C} (-y_i \nabla f(\alpha)_i)}{|\{i \mid 0 < \alpha_i < C\}|} \end{aligned} \quad (57)$$

根据 $b = -\rho$ , 我们可以得到

$$\rho = \frac{\sum_{i: 0 < \alpha_i < C} (y_i \nabla f(\alpha)_i)}{|\{i \mid 0 < \alpha_i < C\}|} \quad (58)$$

$$\begin{aligned}
& -M(\alpha) = \max\{y_j \nabla f(\alpha)_j \mid a_j = 0, y_j = -1 \text{ or } a_j = C, y_j = 1\} \\
& \leq \rho \\
& \leq -m(\alpha) = \min\{y_i \nabla f(\alpha)_i \mid a_i = 0, y_i = 1 \text{ or } a_i = C, y_i = -1\}
\end{aligned} \tag{59}$$

如果没有满足条件的 $\alpha_i$ ，即没有 $0 < \alpha_i < C$ ，我们利用(59)，取这个范围的中点，接下来我们看下代码，对应的函数是Solver::calculate\_rho

```

double r;
int nr_free = 0;
double ub = INF, lb = -INF, sum_free = 0;
for (int i=0;i<active_size;i++) {
    double yG = y[i]*G[i];
    if (is_upper_bound(i)) {
        if (y[i]==-1)
            ub = min(ub,yG);
        else
            lb = max(lb,yG);
    } else if (is_lower_bound(i)) {
        if (y[i]==+1)
            ub = min(ub,yG);
        else
            lb = max(lb,yG);
    } else {
        ++nr_free;
        sum_free += yG;
    }
}
if (nr_free > 0)
    r = sum_free/nr_free;
else
    r = (ub+lb)/2;

```



```
return r;
```

- $yG \iff y_i \nabla f(\alpha)$
- $\text{nr\_free} \iff |\{i \mid 0 < \alpha_i < C\}|$
- $\text{if}(\text{nr\_free} > 0) \iff \text{判断是否存在 } 0 < \alpha_i < C$
- $\text{lb} \iff -M(\alpha) = \max_{j \in I_{low}(\alpha)} y_j \nabla f(\alpha_j)$
- $\text{ub} \iff -m(\alpha) = \min_{i \in I_{up}(\alpha)} y_i \nabla f(\alpha)_i$
- $r = (\text{ub} + \text{lb})/2; \iff \text{取(59)的中点}$

## 参考文献

- [1] 《LIBSVM: A Library for Support Vector Machines》
- [2] 《Working Set Selection Using Second Order Information for Training Support Vector Machines》
- [3] 《Convex Optimization》
- [4] 《统计学习方法》
- [5] <http://blog.pluskid.org/?p=702>
- [6] <http://blog.csdn.net/zhuyue3938199/article/details/7469868>
- [7] <http://blog.csdn.net/zhuyue3938199/article/details/7605977>
- [8] <http://blog.csdn.net/cyningsun/article/details/8705648>
